# Supplementary material for: In Vivo CRISPR/Cas9-Mediated Genome Editing Mitigates Photoreceptor Degeneration in a Mouse Model of X-Linked Retinitis Pigmentosa
Source: PubMed Central journal article supplement — Invest Ophthalmol Vis Sci. 2020 Apr 24;61(4):31. doi: 10.1167/iovs.61.4.31 (PMC7401909; doi:10.1167/iovs.61.4.31), 2020-04-24
Supplement: iovs-61-4-31_s001.pdf [file iovs-61-4-31_s001.pdf]

**Supplementary Table 2.** Sequence information for top 12 potential off- target sites.

| Sequence                  | Score | Mismatches       | UCSC gene | Locus            |
|---------------------------|-------|------------------|-----------|------------------|
| GATCATTATGACGCTCAATTCAG   | 1.4   | 3MMs [5:9:10]    | —         | chr6:-107420885  |
| TTTACTTAATAAGCTCAATTAAG   | 0.7   | 4MMs [1:2:4:12]  | —         | chr5:+17563880   |
| GATGGTTAAGATGCTCAATTTAG   | 0.6   | 4MMs [4:5:10:12] | —         | chr1:+160603090  |
| CATACTTGATACACTCAATTCAG   | 0.6   | 4MMs [1:4:8:13]  | —         | chr1:-35319875   |
| TAACCTAAATAAGCTCAATTTAG   | 0.5   | 4MMs [1:3:7:12]  | —         | chr10:-97184127  |
| GATCAATCATAGGCTCAATTTAG   | 0.4   | 4MMs [5:6:8:12]  | —         | chr10:-67231029  |
| CCTCCTTAATCAGCTCAATTGAG   | 0.4   | 4MMs [1:2:11:12] | —         | chr16:+78469830  |
| GATCTTAAAACTCTCAATTAAG    | 0.3   | 4MMs [5:7:10:13] | —         | chr1:+192688201  |
| CATCTTTAATTCTCTCAATTGGG   | 0.3   | 4MMs [1:5:11:13] | —         | chr13:-44021747  |
| TACCCTTAATTCACACTCAATTGAG | 0.3   | 4MMs [1:3:11:13] | —         | chr9:-103823359  |
| AAACCTTAATAGGCTCTATTTAG   | 0.3   | 4MMs [1:3:12:17] | —         | chr14:-121514294 |
| TATCCTTTATATACTCAATTGAG   | 0.3   | 4MMs [1:8:12:13] | —         | chrX:-66268442   |
