# Supplementary material for: In Vivo CRISPR/Cas9-Mediated Genome Editing Mitigates Photoreceptor Degeneration in a Mouse Model of X-Linked Retinitis Pigmentosa
Source: PubMed Central journal article supplement — Invest Ophthalmol Vis Sci. 2020 Apr 24;61(4):31. doi: 10.1167/iovs.61.4.31 (PMC7401909; doi:10.1167/iovs.61.4.31), 2020-04-24
Supplement: iovs-61-4-31_s002.pdf [file iovs-61-4-31_s002.pdf]

**Supplemental Table 3.** Primer sequences for detecting on- and off-target effects by deep sequencing.

| <b>Primer Name</b> | <b>Sequence (5'-3')</b> | <b>Note</b>        |
|--------------------|-------------------------|--------------------|
| <i>mRpgr</i> -F    | GCTAGGCATGTGTTCTACC     | On_target          |
| <i>mRpgr</i> -R    | CTTCTCTGTCTACTACTTTCCA  |                    |
| OT1-F              | CTCTATGGAGCCAATTATCTG   | Off target site 1  |
| OT1-R              | CACACTGCCCAAACCTTA      |                    |
| OT2-F              | ATATGGGTACTTGAGGGTTC    | Off target site 2  |
| OT2-R              | TTGTCTTGGTGCCAATAAG     |                    |
| OT3-F              | AATATCATAGCTGCCAGGG     | Off target site 3  |
| OT3-R              | GCCTCTTCTCTCCTTAAACT    |                    |
| OT4-F              | TTTACCAGAAAGTTGGGAAC    | Off target site 4  |
| OT4-R              | TTGGCTGGAGGTTGTAAG      |                    |
| OT5-F              | GGATAGGTTAGCAGATAGAATG  | Off target site 5  |
| OT5-R              | CACAGACAAATGCAGACAAA    |                    |
| OT6-F              | GGTCCAATCTTCTGATGTC     | Off target site 6  |
| OT6-R              | ATTACTGCCTGAGAAATCCT    |                    |
| OT7-F              | AAGTGGCTGCTCTGACAA      | Off target site 7  |
| OT7-R              | GGGTAAGTTGGTGGGACT      |                    |
| OT8-F              | CCAGCTTCAAATCGTTAC      | Off target site 8  |
| OT8-R              | GATATGGTTGAAAGAGATC     |                    |
| OT9-F              | TCGAGCTATTCAGTGTATGC    | Off target site 9  |
| OT9-R              | AACTGCCTGCCTGAGATT      |                    |
| OT10-F             | AATCAACGCATCGCTTCC      | Off target site 10 |
| OT10-R             | CTGGTATCCGTACTTTCAAATC  |                    |
| OT11-F             | TTGGCCCTTCACTGGTTT      | Off target site 11 |
| OT11-R             | TTGGTCTGCCTGTTATTCAA    |                    |
| OT12-F             | TGTTTCCATTGGTGATTGAATA  | Off target site 12 |
| OT12-R             | AGTGGCAATGAGCATGTAA     |                    |
